# Supplementary material for: FOXO1 is a master regulator of memory programming in CAR T cells
Source: Nature. 2024 Apr 10;629(8010):211–8. doi: 10.1038/s41586-024-07300-8 (PMC11062920; doi:10.1038/s41586-024-07300-8)
Supplement: Supplementary file 3 — FOXO1 regulon genes. [file 41586_2024_7300_MOESM3_ESM.xlsx]

## Sheet: Sheet1
FOXO1_regulon
PTPRO
GIMAP7
TNFSF13B
KLF3
GIMAP5
SELL
GPA33
GP5
JAK2
CA6
TNS1
TLR6
NT5E
ACVR1
KLF7
SESN3
CYP1B1
FAM69A
CYB561
TRAT1
TMEM181
MAP1A
ANK3
CEP170
CRYBG3
MAP3K1
SLC37A3
AKT3
FAM126A
OXSM
CCR4
CHD7
CBLL1
MINA
RUNX2
CPOX
RALB
DIP2B
REXO2
SOCS2
CDR2
